# Supplementary material for: Early-Life Exposure to Malnutrition From the Chinese Famine on Risk of Asthma and Chronic Obstructive Pulmonary Disease in Adulthood
Source: Frontiers journal article supplement (doi:10.3389/fnut.2022.848108), 2022-05-31
Supplement: Data_Sheet_1.PDF [file Data_Sheet_1.PDF]

## **Supporting information**

### **Early-life exposure to malnutrition from the Chinese famine on risk of asthma and chronic obstructive pulmonary disease in adulthood**

## **Content**

**Figure S1.** The map about the distribution of the famine-affected areas in China.

**Table S1.** Sociodemographic and behaviour characteristics of the participants who having asthma or COPD and the total participants in the study.

**Table S2.** Adjusted  $\beta$  and 95%CI of the association between famine exposure with PEF change stratified by potential modifiers (reference: non-exposed group).

**Table S3.** Adjusted odds ratio and 95% confidence interval for the risk of asthma or COPD by exposure to the Chinese Famine with combined old and young reference group.

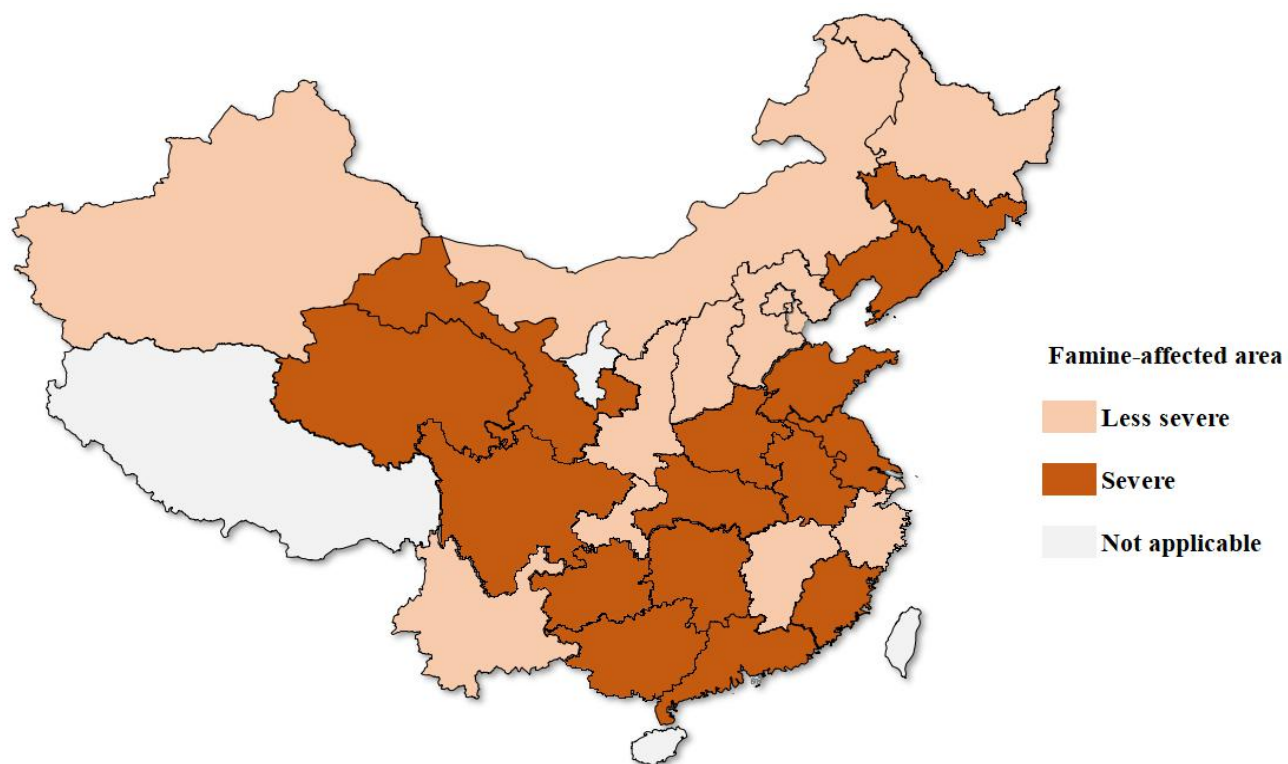

**Figure S1.** The map about the distribution of the famine-affected areas in China.

**Table S1.** Sociodemographic and behaviour characteristics of the participants who having asthma or COPD and the total participants in the study.

|                                       | Total<br>(N=6771) | Diagnosed asthma<br>(N=201) | Diagnosed COPD<br>(N=550) |
|---------------------------------------|-------------------|-----------------------------|---------------------------|
| <b>Age (Mean <math>\pm</math> Sd)</b> | 54.12 $\pm$ 5.11  | 55.04 $\pm$ 4.92            | 55.0 $\pm$ 5.0            |
| <b>Male (%)</b>                       | 3067 (45.3)       | 100 (49.8)                  | 285 (51.8)                |
| <b>BMI (kg/m<sup>2</sup>)</b>         | 20.84 $\pm$ 7.18  | 21.10 $\pm$ 7.65            | 20.85 $\pm$ 7.14          |
| <b>Waist circumference (cm)</b>       | 84.38 $\pm$ 12.70 | 84.99 $\pm$ 11.55           | 84.41 $\pm$ 12.77         |
| <b>Educational level</b>              |                   |                             |                           |
| $\leq$ Primary school                 | 4306 (63.6)       | 148 (73.6)**                | 396 (72.0)***             |
| Middle school                         | 1622 (24.0)       | 41 (20.4)                   | 113 (20.5)                |
| $\geq$ High school                    | 843 (12.4)        | 12 (6.0)                    | 41 (7.5)                  |
| <b>Married (%)</b>                    | 6307 (93.1)       | 179 (89.1)                  | 505 (91.8)                |
| <b>Family's economic status</b>       |                   |                             |                           |
| $\geq$ Average level                  | 3982 (58.8)       | 111 (55.2)                  | 278 (50.5)**              |
| < Average level                       | 2789 (41.2)       | 90 (44.8)                   | 272 (49.5)                |
| <b>Residential locations</b>          |                   |                             |                           |
| Urban                                 | 2835 (41.9)       | 74 (36.8)                   | 181 (32.9)                |
| Rural                                 | 3936 (58.1)       | 127 (63.2)                  | 369 (67.1)**              |
| <b>Cigarette smoking status</b>       |                   |                             |                           |
| Never                                 | 4188 (61.9)       | 117 (58.2)                  | 287 (52.2)***             |
| Current                               | 2088 (30.8)       | 66 (32.8)                   | 198 (36.0)                |
| Former                                | 495 (7.3)         | 18 (9.0)                    | 65 (11.8)                 |
| <b>Alcohol consumption</b>            |                   |                             |                           |
| Yes                                   | 2719 (40.2)       | 82 (40.8)                   | 229 (41.6)                |
| No                                    | 4052 (59.8)       | 119 (59.2)                  | 321 (58.4)                |
| <b>Type of cooking fuels</b>          |                   |                             |                           |
| Clean                                 | 2043 (30.2)       | 45 (22.4)                   | 130 (23.6)                |
| Solid                                 | 4728 (69.8)       | 156 (77.6)*                 | 420 (76.4)***             |

\* $P < 0.05$ , \*\*  $P < 0.01$ , \*\*\*  $P < 0.001$

**Table S2.** Adjusted  $\beta$  and 95%CI of the association between famine exposure with PEF change stratified by potential modifiers (reference: non-exposed group).

| Variables                         | Categories  | Exposure           | PEF indicator              |
|-----------------------------------|-------------|--------------------|----------------------------|
| Gender                            | Male        | Fetal exposed      | -12.255(-27.087, 2.577)    |
|                                   |             | Preschool exposed  | -11.174 (-25.646, 2.126)   |
|                                   |             | School-age exposed | -4.567 (-16.989, 8.076)    |
|                                   | Female      | Fetal exposed      | -9.405(-27.278, 8.468)     |
|                                   |             | Preschool exposed  | -2.481 (-12.332, 9.239)    |
|                                   |             | School-age exposed | -3.388 (-18.482, 11.704)   |
| Severity of famine-affected areas | Severe      | Fetal exposed      | -14.181(-25.298, -3.072)*  |
|                                   |             | Preschool exposed  | -14.308 (-19.653,1.036)    |
|                                   |             | School-age exposed | -0.929 (-16.575, 14.717)   |
|                                   | Less severe | Fetal exposed      | -7.539 (-22.342, 7.264)    |
|                                   |             | Preschool exposed  | -1.978 (-14.075, 10.118)   |
|                                   |             | School-age exposed | -5.939(-18.129, 6.250)     |
| Cigarette smoking                 | Have        | Fetal exposed      | -10.258(-32.532, 12.015)   |
|                                   |             | Preschool exposed  | -0.749 (-19.310, 17.812)   |
|                                   |             | School-age exposed | -6.934(-26.045, 12.175)    |
|                                   | Have not    | Fetal exposed      | -10.412(-24.255, 3.431)    |
|                                   |             | Preschool exposed  | -8.172(-19.883, 3.539)     |
|                                   |             | School-age exposed | -2.953(-14.705, 8.799)     |
| Type of cooking fuels             | Clean fuels | Fetal exposed      | -2.517(-23.271, 18.236)    |
|                                   |             | Preschool exposed  | -3.484(-21.240, 14.272)    |
|                                   |             | School-age exposed | -2.936 (-11.948, 7.821)    |
|                                   | Solid fuels | Fetal exposed      | -10.412 (-19.255, -1.012)* |
|                                   |             | Preschool exposed  | -8.172 (-17.883, 1.539)    |
|                                   |             | School-age exposed | -2.952 (-14.705, 8.799)    |

\* $P < 0.05$

**Table S3.** Adjusted odds ratio and 95% CI for the risk of asthma or COPD in adulthood by exposure to the Chinese famine with combined old and young reference group.

|                                   | Diagnosed asthma          | Diagnosed COPD           |
|-----------------------------------|---------------------------|--------------------------|
| Non-exposed and preschool exposed | ref                       | ref                      |
| Fetal exposed                     | <b>1.83 (1.23–2.73)**</b> | 1.02 (0.77–1.35)         |
| School-age exposed                | <b>1.48 (1.07–2.04)*</b>  | <b>1.26 (1.04–1.54)*</b> |

Note : 95%CI: 95% confidence intervals

Model adjusted for age, sex, BMI, WC, education, marriage status, cigarette smoking, alcohol consumption, family's financial status, residential locations and type of cooking fuels.

\* $P < 0.05$ , \*\* $P < 0.01$
